# Supplementary material for: Agricultural Waste Recycling Optimization of Family Farms Based on Environmental Management Accounting in Rural China
Source: MDPI journal article supplement (doi:10.3390/su13105515), 2021-05-14
Supplement: s1 [file s1]

Article

# Agricultural Waste Recycling Optimization of Family Farms Based on Environmental Management Accounting in Rural China

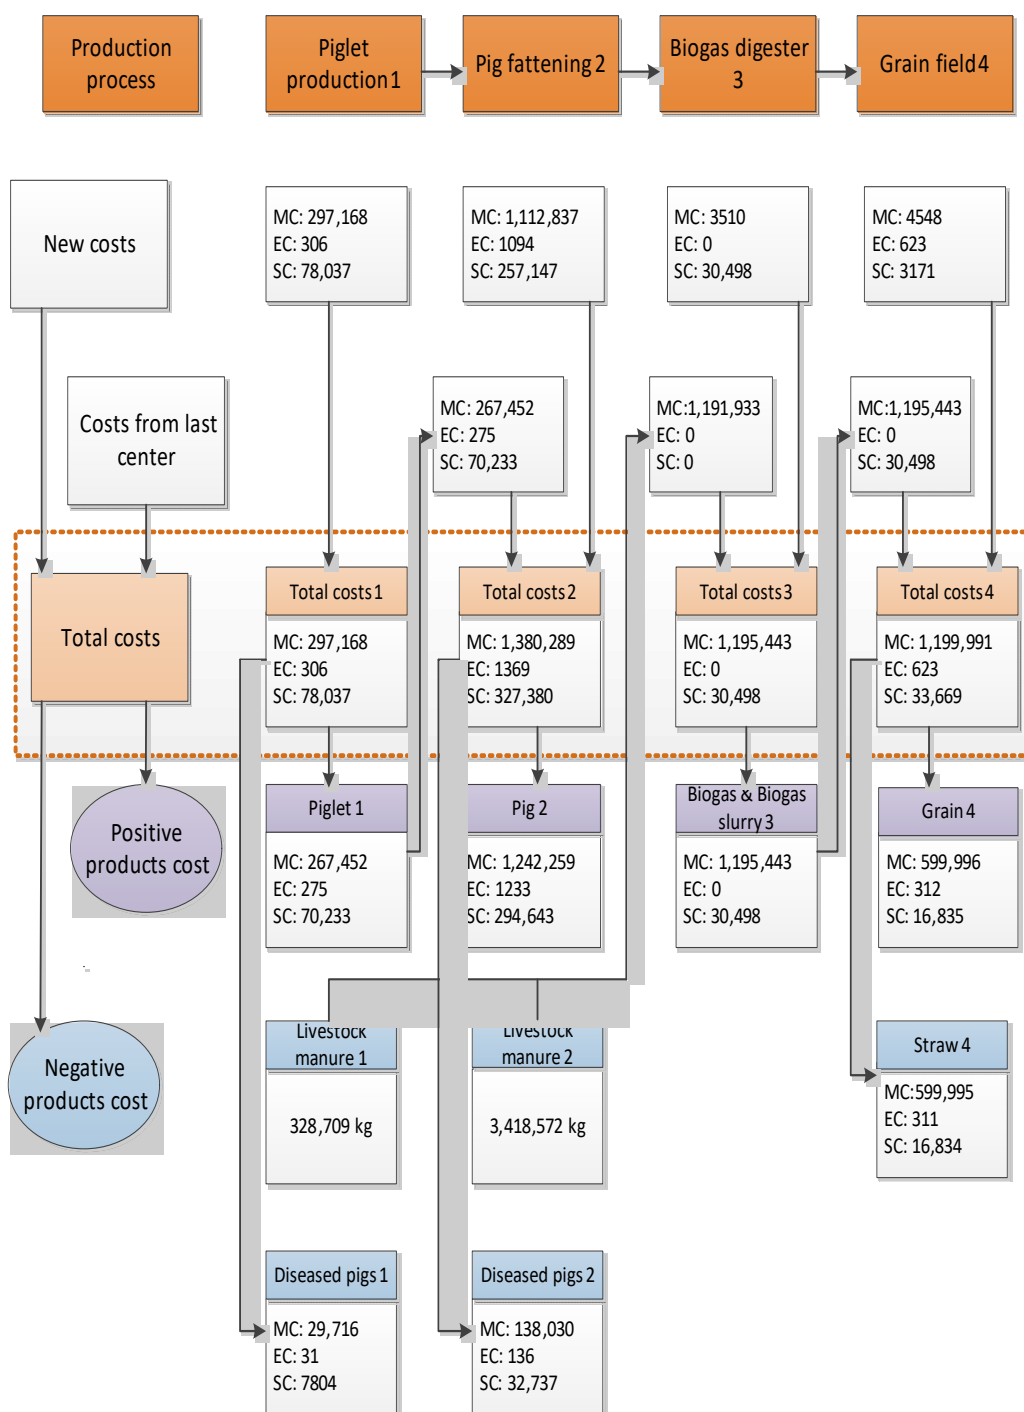

**Figure S1.** Cost flow based on material flow analysis (currency unit: US\$).

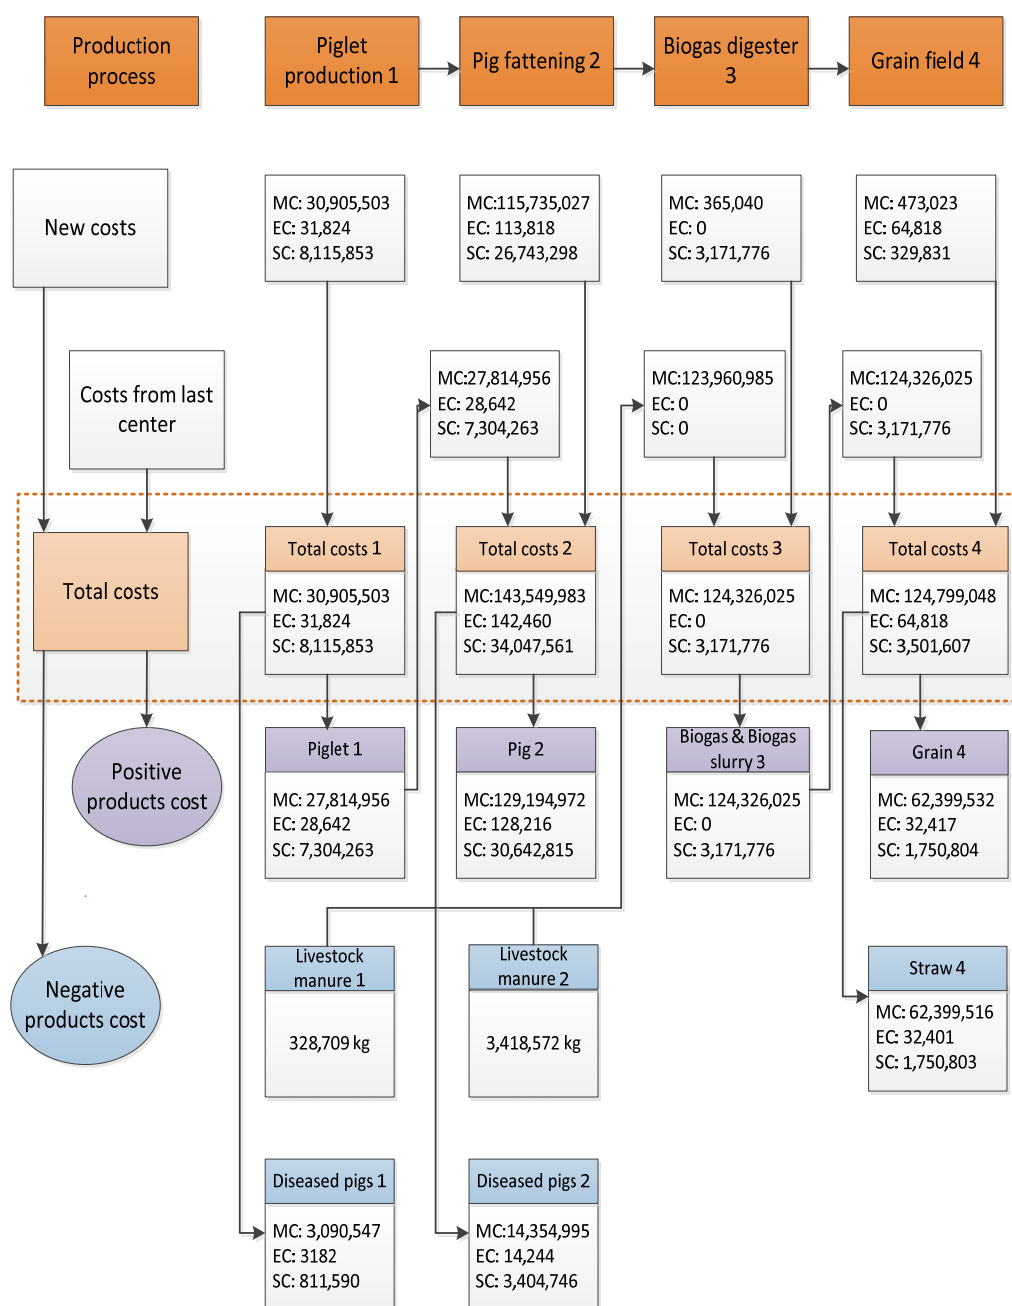

**Figure S2.** Cost flow based on material flow analysis (currency unit: JPY).
